# Supplementary material for: Immunogenicity of Tetravalent Protein Vaccine SCTV01E-2 against SARS-CoV-2 EG.5 Subvaraint: A Phase 2 Trial
Source: MDPI journal article supplement (doi:10.3390/vaccines12020175), 2024-02-08
Supplement: s1 [file s1]

## Supplementary Materials

Supplementary to: Tang J, Zhu C, Xu Q, et al. Immunogenicity of Tetravalent Protein Vaccine, SCTV01E-2 against SARS-CoV-2 EG.5 Subvaraint: a Phase 2 Trial.

This appendix has been provided by the authors to give readers additional information about the work.

|                                                                                                                                                                    |    |
|--------------------------------------------------------------------------------------------------------------------------------------------------------------------|----|
| Supplementary Materials .....                                                                                                                                      | 1  |
| <b>Table S1.</b> Demographic characteristics of participants in the Immunogenicity Per-Protocol Set .....                                                          | 3  |
| <b>Table S2.</b> Geometric Mean Titer (GMT) of Neutralizing Antibodies Against Omicron EG.5 and XBB.1 variants in the Full Analysis Set .....                      | 5  |
| <b>Table S3.</b> Seroconversion Rate (SRR) of Neutralizing Antibodies Against Omicron EG.5 and XBB.1 variants in the Full Analysis Set .....                       | 6  |
| <b>Table S4.</b> Solicited local adverse reactions of the study vaccines.....                                                                                      | 7  |
| <b>Table S5.</b> Solicited systemic adverse reactions of the study vaccines .....                                                                                  | 8  |
| <b>Figure S1.</b> Subgroup analysis of geometric mean titer (GMT) and the least square geometric mean ratio (LS GMR) of live virus nAb against Omicron EG.5. ....  | 10 |
| <b>Figure S2.</b> Subgroup analysis of seroresponse rate (SRR) of Live Virus nAb against Omicron EG.5. ....                                                        | 11 |
| <b>Figure S3.</b> Subgroup analysis of geometric mean titer (GMT) and the least square geometric mean ratio (LS GMR) of live virus nAb against Omicron XBB.1. .... | 12 |
| Abbreviations: GMT, geometric mean titer; LS GMR, least square geometric mean ratio. ....                                                                          | 12 |
| <b>Figure S4.</b> Subgroup analysis of seroresponse rate (SRR) of live virus nAb against Omicron XBB.1. ....                                                       | 13 |

**Table S1.** Demographic characteristics of participants in the Immunogenicity Per-Protocol Set

|                                                           | SCTV01E<br>(N = 196)<br>n (%) | SCTV01E-2<br>(N = 203)<br>n (%) | Total<br>(N = 399)<br>n (%) |
|-----------------------------------------------------------|-------------------------------|---------------------------------|-----------------------------|
| <b>Age (Year)</b>                                         |                               |                                 |                             |
| N                                                         | 196                           | 203                             | 399                         |
| Mean (SD)                                                 | 55.9 (12.5)                   | 55.0 (11.7)                     | 55.4 (12.1)                 |
| Median (Min, Max)                                         | 57.5 (20, 81)                 | 58.0 (19, 83)                   | 58.0 (19, 83)               |
| <b>Age subgroups-randomization,<br/>n (%)</b>             |                               |                                 |                             |
| 18-59 years                                               | 120 (61.2)                    | 121 (59.6)                      | 241 (60.4)                  |
| ≥60 years                                                 | 76 (38.8)                     | 82 (40.4)                       | 158 (39.6)                  |
| <b>Sex, n (%)</b>                                         |                               |                                 |                             |
| Male                                                      | 91 (46.4)                     | 93 (45.8)                       | 184 (46.1)                  |
| Female                                                    | 105 (53.6)                    | 110 (54.2)                      | 215 (53.9)                  |
| <b>Nation, n (%)</b>                                      |                               |                                 |                             |
| Han                                                       | 195 (99.5)                    | 203 (100.0)                     | 398 (99.7)                  |
| Others                                                    | 1 (0.5)                       | 0                               | 1 (0.3)                     |
| <b>BMI (kg/m<sup>2</sup>) ‡</b>                           |                               |                                 |                             |
| N                                                         | 196                           | 203                             | 399                         |
| Mean (SD)                                                 | 26.0 (3.5)                    | 26.5 (3.5)                      | 26.3 (3.5)                  |
| Median (Min, Max)                                         | 25.8 (18.9, 38.6)             | 26.6 (16.4, 39.8)               | 26.1 (16.4, 39.8)           |
| <b>History of SARS-CoV-2<br/>infection, n (%)</b>         |                               |                                 |                             |
| Yes                                                       | 53 (27.0)                     | 52 (25.6)                       | 105 (26.3)                  |
| No                                                        | 143 (73.0)                    | 151 (74.4)                      | 294 (73.7)                  |
| <b>Previous vaccination/infection<br/>interval, n (%)</b> |                               |                                 |                             |
| 6-11 months                                               | 62 (31.6)                     | 63 (31.0)                       | 125 (31.3)                  |
| ≥12 months                                                | 134 (68.4)                    | 140 (69.0)                      | 274 (68.7)                  |
| <b>IgM at baseline</b>                                    |                               |                                 |                             |
| Positive                                                  | 0                             | 0                               | 0                           |

|                                                                            | SCTV01E<br>(N = 196)<br>n (%) | SCTV01E-2<br>(N = 203)<br>n (%) | Total<br>(N = 399)<br>n (%) |
|----------------------------------------------------------------------------|-------------------------------|---------------------------------|-----------------------------|
| Negative                                                                   | 196 (100.0)                   | 203 (100.0)                     | 399 (100.0)                 |
| <b>Booster dose of COVID-19<br/>vaccine, n (%)</b>                         |                               |                                 |                             |
| Yes                                                                        | 143 (73.0)                    | 145 (71.4)                      | 288 (72.2)                  |
| No                                                                         | 53 (27.0)                     | 58 (28.6)                       | 111 (27.8)                  |
| <b>Type of last received<br/>COVID-19<br/>vaccine-randomization, n (%)</b> |                               |                                 |                             |
| Inactive vaccine                                                           | 91 (46.4)                     | 97 (47.8)                       | 188 (47.1)                  |
| Adenovirus vector vaccine                                                  | 38 (19.4)                     | 33 (16.3)                       | 71 (17.8)                   |
| Recombinant protein vaccine                                                | 67 (34.2)                     | 73 (36.0)                       | 140 (35.1)                  |
| Other vaccines                                                             | 0                             | 0                               | 0                           |
| <b>Pre-existing comorbidities, n<br/>(%)</b>                               |                               |                                 |                             |
| Yes                                                                        | 74 (37.8)                     | 90 (44.3)                       | 164 (41.1)                  |
| No                                                                         | 122 (62.2)                    | 113 (55.7)                      | 235 (58.9)                  |

‡ BMI, the body mass index. The body-mass index is the weight in kilograms divided by the square of the height in meters.

**Table S2.** Geometric Mean Titer (GMT) of Neutralizing Antibodies Against Omicron EG.5 and XBB.1 variants in the Full Analysis Set

|                              | SCTV01E<br>(N = 215) | SCTV01E-2<br>(N = 214) |
|------------------------------|----------------------|------------------------|
| <b>EG.5</b>                  |                      |                        |
| Baseline (Day 0)             |                      |                        |
| n                            | 209                  | 209                    |
| GMT (95% CI)                 | 94 (78, 112)         | 103 (90, 119)          |
| Day 14                       |                      |                        |
| n                            | 207                  | 209                    |
| GMT (95% CI)                 | 514 (459, 574)       | 922 (825, 1032)        |
| GMFI (95% CI)                | 5.5 (4.6, 6.4)       | 8.9 (7.6, 10.4)        |
| LS GMR (95% CI) <sup>†</sup> |                      | 1.76 (1.52, 2.04)      |
| P value <sup>†</sup>         |                      | <0.001                 |
| <b>XBB.1</b>                 |                      |                        |
| Baseline (Day0)              |                      |                        |
| n                            | 213                  | 214                    |
| GMT (95% CI)                 | 270 (233, 312)       | 324 (288, 364)         |
| Day 14                       |                      |                        |
| n                            | 211                  | 214                    |
| GMT (95% CI)                 | 1422 (1264, 1600)    | 1879 (1682, 2100)      |
| GMFI (95% CI)                | 5.3 (4.5, 6.2)       | 5.8 (5.0, 6.7)         |
| LS GMR (95% CI) <sup>†</sup> |                      | 1.28 (1.09, 1.50)      |
| P value <sup>†</sup>         |                      | 0.003                  |

<sup>†</sup>The immunogenicity data were analyzed based on covariance (ANCOVA) model, covariates included intervention groups, stratification factors and baseline values (in log-transformed scale).

Abbreviations: N, number of participants in the population; n, number of participants in the specific category; GMT, geometric mean titer; GMFI: geometric mean fold increase from baseline; LS GMR, least square geometric mean ratio.

**Table S3.** Seroconversion Rate (SRR) of Neutralizing Antibodies Against Omicron EG.5 and XBB.1 variants in the Full Analysis Set

|                                                             | <b>SCTV01E</b><br>(N = 215) | <b>SCTV01E-2</b><br>(N = 214) |
|-------------------------------------------------------------|-----------------------------|-------------------------------|
| <b>EG.5</b>                                                 |                             |                               |
| Day 14                                                      |                             |                               |
| SRR, n/N                                                    | 59.4 (123/207)              | 78.5 (164/209)                |
| SRR (95% CI) <sup>†</sup>                                   | 52.4, 66.2                  | 72.3, 83.8                    |
| Difference of SRRs between two groups (95% CI) <sup>‡</sup> |                             | 19.07 (10.24, 27.68)          |
| P value <sup>‡</sup>                                        |                             | <0.001                        |
| <b>XBB.1</b>                                                |                             |                               |
| Day 14                                                      |                             |                               |
| SRR, n/N                                                    | 60.7 (128/211)              | 68.7 (147/214)                |
| SRR (95% CI) <sup>†</sup>                                   | 53.7, 67.3                  | 62.0, 74.8                    |
| Difference of SRRs between two groups (95% CI) <sup>‡</sup> |                             | 8.10 (-1.00, 17.08)           |
| P value <sup>‡</sup>                                        |                             | 0.081                         |

<sup>†</sup>Confidential interval of Clopper-Pearson.

<sup>‡</sup>estimated from the stratified Miettinen-Nurminen method, stratification based on the actual stratification factors.

Abbreviations: N, number of participants in the population; n, number of participants in the specific category; SRR, seroresponse rate.

**Table S4.** Solicited local adverse reactions of the study vaccines

| <b>Preferred Term<br/>Intensity</b>                                                                         | <b>SCTV01E<br/>(N = 215)<br/>n (%)</b> | <b>SCTV01E-2<br/>(N = 214)<br/>n (%)</b> |
|-------------------------------------------------------------------------------------------------------------|----------------------------------------|------------------------------------------|
| <b>Number of Participants with at Least<br/>One Study Vaccine-Related Solicited<br/>Local Adverse Event</b> | 60 (27.9)                              | 59 (27.6)                                |
| Grade 1                                                                                                     | 51 (23.7)                              | 49 (22.9)                                |
| Grade 2                                                                                                     | 9 (4.2)                                | 10 (4.7)                                 |
| Grade 3 and above                                                                                           | 0                                      | 0                                        |
| <b>Pain</b>                                                                                                 | 52 (24.2)                              | 52 (24.3)                                |
| Grade 1                                                                                                     | 47 (21.9)                              | 48 (22.4)                                |
| Grade 2                                                                                                     | 5 (2.3)                                | 4 (1.9)                                  |
| Grade 3 and above                                                                                           | 0                                      | 0                                        |
| <b>Pruritus</b>                                                                                             | 9 (4.2)                                | 5 (2.3)                                  |
| Grade 1                                                                                                     | 9 (4.2)                                | 5 (2.3)                                  |
| Grade 2                                                                                                     | 0                                      | 0                                        |
| Grade 3 and above                                                                                           | 0                                      | 0                                        |
| <b>Swelling</b>                                                                                             | 5 (2.3)                                | 8 (3.7)                                  |
| Grade 1                                                                                                     | 3 (1.4)                                | 3 (1.4)                                  |
| Grade 2                                                                                                     | 2 (0.9)                                | 5 (2.3)                                  |
| Grade 3 and above                                                                                           | 0                                      | 0                                        |
| <b>Erythema</b>                                                                                             | 1 (0.5)                                | 4 (1.9)                                  |
| Grade 1                                                                                                     | 0                                      | 2 (0.9)                                  |
| Grade 2                                                                                                     | 1 (0.5)                                | 2 (0.9)                                  |
| Grade 3 and above                                                                                           | 0                                      | 0                                        |
| <b>Induration</b>                                                                                           | 1 (0.5)                                | 1 (0.5)                                  |
| Grade 1                                                                                                     | 0                                      | 1 (0.5)                                  |
| Grade 2                                                                                                     | 1 (0.5)                                | 0                                        |
| Grade 3 and above                                                                                           | 0                                      | 0                                        |

MedDRA Version 26.0

Abbreviations: N, number of participants in the population; n, number of participants in the specific category; %, percentage of participants with N as the denominator.

**Table S5.** Solicited systemic adverse reactions of the study vaccines

| <b>Preferred Term<br/>Intensity</b>                                                                    | <b>SCTV01E<br/>(N = 215)<br/>n (%)</b> | <b>SCTV01E-2<br/>(N = 214)<br/>n (%)</b> |
|--------------------------------------------------------------------------------------------------------|----------------------------------------|------------------------------------------|
| <b>Number of Participants with at Least One Study Vaccine-Related Solicited Systemic Adverse Event</b> | 27 (12.6)                              | 44 (20.6)                                |
| Grade 1                                                                                                | 16 (7.4)                               | 28 (13.1)                                |
| Grade 2                                                                                                | 10 (4.7)                               | 10 (4.7)                                 |
| Grade 3 and above                                                                                      | 1 (0.5)                                | 6 (2.8)                                  |
| <b>Pyrexia</b>                                                                                         | 17 (7.9)                               | 25 (11.7)                                |
| Grade 1                                                                                                | 12 (5.6)                               | 17 (7.9)                                 |
| Grade 2                                                                                                | 4 (1.9)                                | 3 (1.4)                                  |
| Grade 3 and above                                                                                      | 1 (0.5)                                | 5 (2.3)                                  |
| <b>Fatigue</b>                                                                                         | 8 (3.7)                                | 18 (8.4)                                 |
| Grade 1                                                                                                | 4 (1.9)                                | 13 (6.1)                                 |
| Grade 2                                                                                                | 4 (1.9)                                | 5 (2.3)                                  |
| Grade 3 and above                                                                                      | 0                                      | 0                                        |
| <b>Headache</b>                                                                                        | 9 (4.2)                                | 16 (7.5)                                 |
| Grade 1                                                                                                | 5 (2.3)                                | 10 (4.7)                                 |
| Grade 2                                                                                                | 4 (1.9)                                | 6 (2.8)                                  |
| Grade 3 and above                                                                                      | 0                                      | 0                                        |
| <b>Myalgia</b>                                                                                         | 4 (1.9)                                | 9 (4.2)                                  |
| Grade 1                                                                                                | 2 (0.9)                                | 6 (2.8)                                  |
| Grade 2                                                                                                | 2 (0.9)                                | 3 (1.4)                                  |
| Grade 3 and above                                                                                      | 0                                      | 0                                        |
| <b>Nausea</b>                                                                                          | 4 (1.9)                                | 6 (2.8)                                  |
| Grade 1                                                                                                | 3 (1.4)                                | 5 (2.3)                                  |
| Grade 2                                                                                                | 1 (0.5)                                | 1 (0.5)                                  |
| Grade 3 and above                                                                                      | 0                                      | 0                                        |
| <b>Arthritis</b>                                                                                       | 3 (1.4)                                | 4 (1.9)                                  |
| Grade 1                                                                                                | 1 (0.5)                                | 1 (0.5)                                  |
| Grade 2                                                                                                | 2 (0.9)                                | 2 (0.9)                                  |
| Grade 3 and above                                                                                      | 0                                      | 1 (0.5)                                  |
| <b>Vomit</b>                                                                                           | 0                                      | 1 (0.5)                                  |
| Grade 1                                                                                                | 0                                      | 0                                        |
| Grade 2                                                                                                | 0                                      | 1 (0.5)                                  |
| Grade 3 and above                                                                                      | 0                                      | 0                                        |
| <b>Chill</b>                                                                                           | 1 (0.5)                                | 0                                        |
| Grade 1                                                                                                | 0                                      | 0                                        |
| Grade 2                                                                                                | 1 (0.5)                                | 0                                        |
| Grade 3 and above                                                                                      | 0                                      | 0                                        |

MedDRA Version 26.0

Abbreviations: N, number of participants in the population; n, number of participants



in the specific category; %, percentage of participants with N as the denominator.

**Figure S1.** Subgroup analysis of geometric mean titer (GMT) and the least square geometric mean ratio (LS GMR) of live virus nAb against Omicron EG.5.

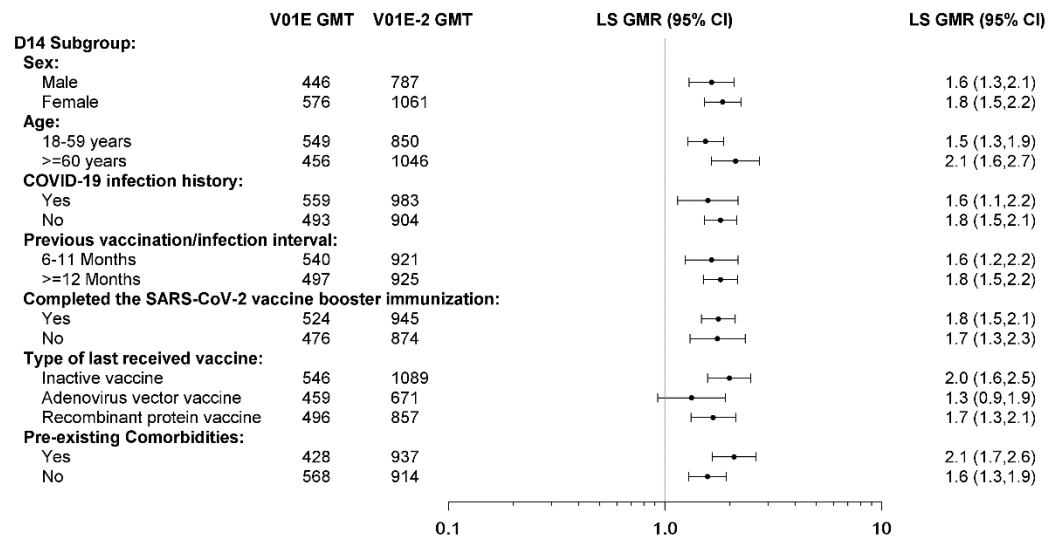

The subgroup analysis was conducted among the population in the immunogenicity per-protocol set, who had a valid immunogenicity test result prior to the administration of study vaccines and after the administration of study vaccines and had a negative result of anti-spike receptor binding domain (RBD) IgM test at baseline but without major protocol deviations.

Abbreviations: GMT, geometric mean titer; LS GMR, least square geometric mean ratio.

**Figure S2.** Subgroup analysis of seroresponse rate (SRR) of Live Virus nAb against Omicron EG.5.

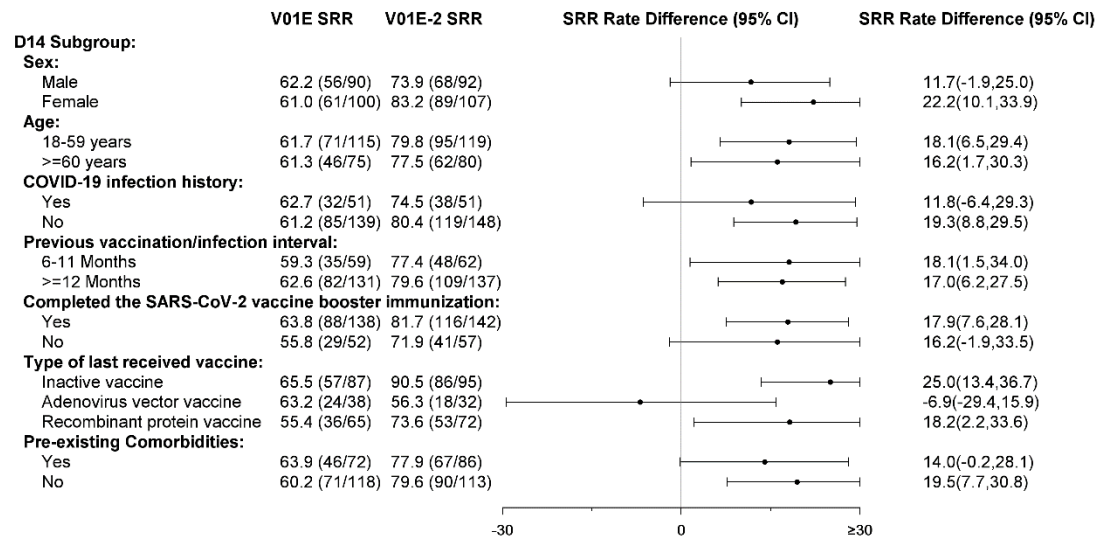

The subgroup analysis was conducted among the population in the immunogenicity per-protocol set, who had a valid immunogenicity test result prior to the administration of study vaccines and after the administration of study vaccines and had a negative result of anti-spike receptor binding domain (RBD) IgM test at baseline but without major protocol deviations. Seroresponse was defined as a change from below the low limit of quantitation (LLOQ) to equal to or above LLOQ, or more than a 4-fold rise if the baseline is equal to or above LLOQ in nAb from baseline.

Abbreviations: SRR, seroresponse rate.

**Figure S3.** Subgroup analysis of geometric mean titer (GMT) and the least square geometric mean ratio (LS GMR) of live virus nAb against Omicron XBB.1.

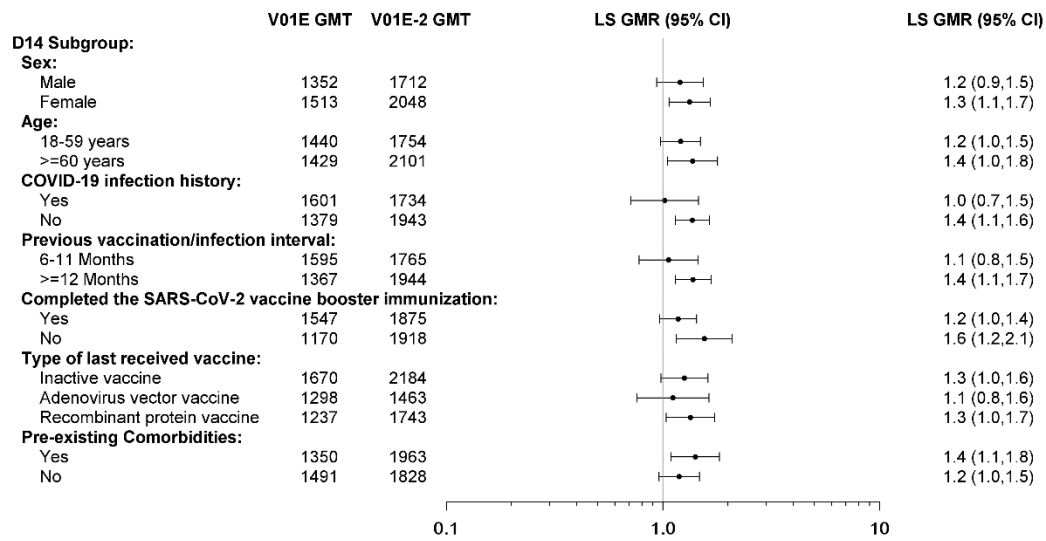

The subgroup analysis was conducted among the population in the immunogenicity per-protocol set, who had a valid immunogenicity test result prior to the administration of study vaccines and after the administration of study vaccines and had a negative result of anti-spike receptor binding domain (RBD) IgM test at baseline but without major protocol deviations.

Abbreviations: GMT, geometric mean titer; LS GMR, least square geometric mean ratio.

**Figure S4.** Subgroup analysis of seroresponse rate (SRR) of live virus nAb against Omicron XBB.1.

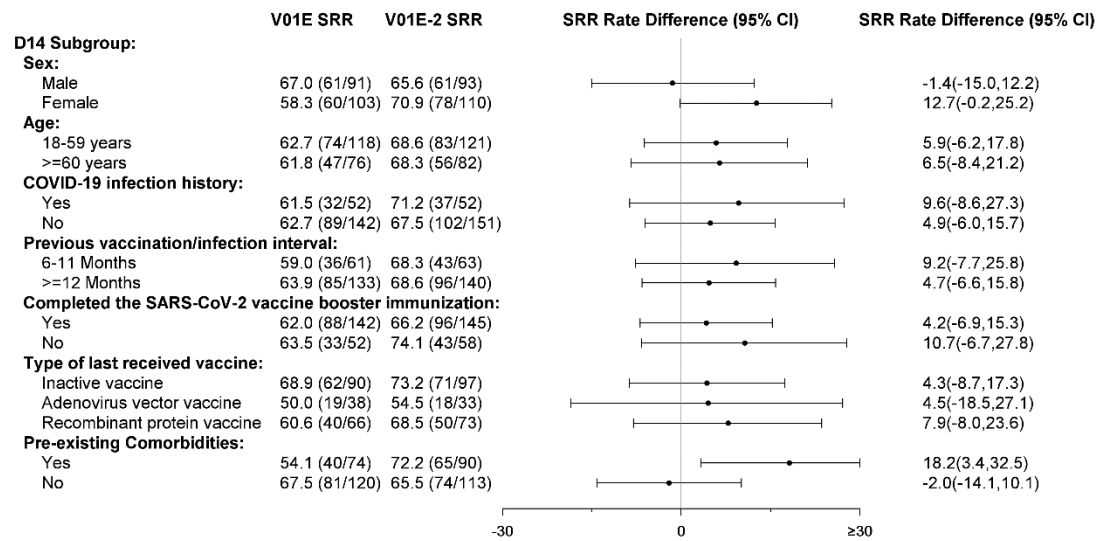

The subgroup analysis was conducted among the population in the immunogenicity per-protocol set, who had a valid immunogenicity test result prior to the administration of study vaccines and after the administration of study vaccines and had a negative result of anti-spike receptor binding domain (RBD) IgM test at baseline but without major protocol deviations. Seroresponse was defined as a change from below the low limit of quantitation (LLOQ) to equal to or above LLOQ, or more than a 4-fold rise if the baseline is equal to or above LLOQ in nAb from baseline.

Abbreviations: SRR, seroresponse rate.
